# Supplementary material
Source: PubMed Central journal article supplement (PMC9623036)

**Supplementary information**

---

**cBAF complex components and MYC cooperate early in CD8 T cell fate**

---

In the format provided by the authors and unedited

Supplementary Figure 1 Source western blot images

Figure 2c

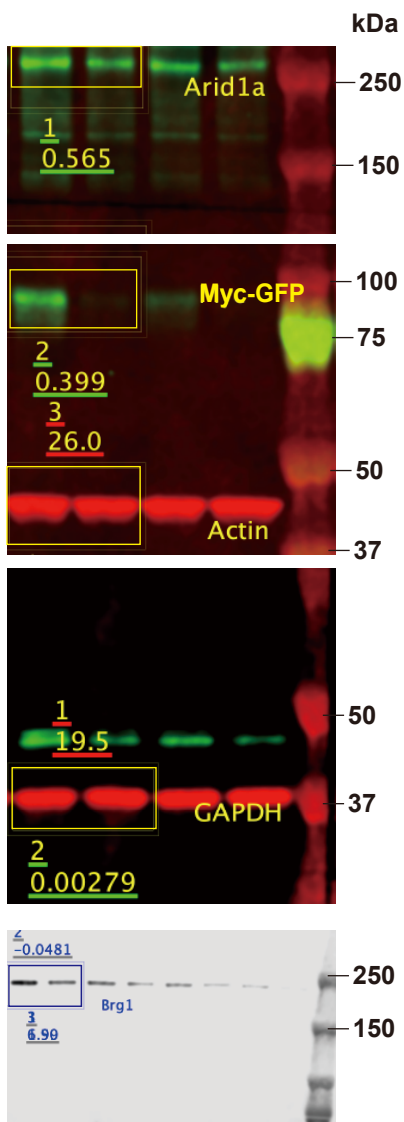

Figure 3a

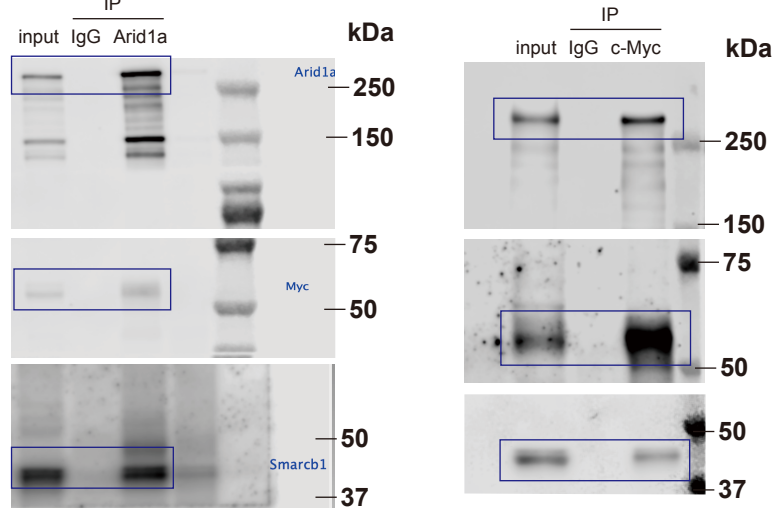

Extended Figure 7b

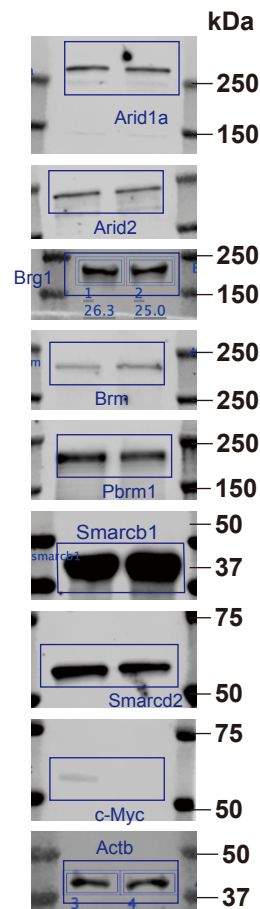

Extended Figure 3a

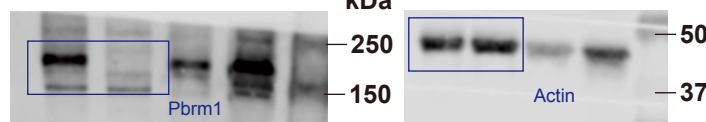

Extended Figure 4c

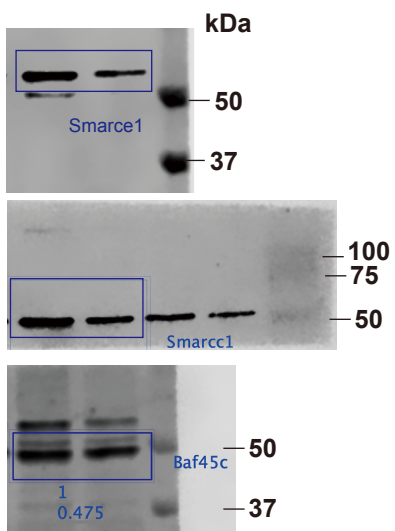

Extended Figure 4d

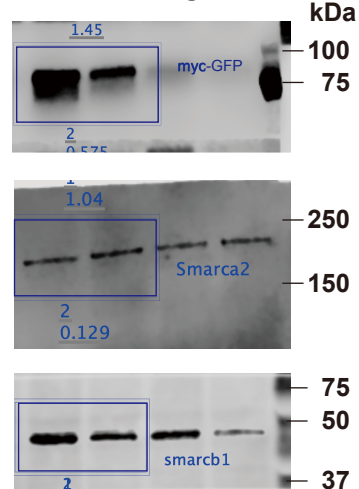

Extended Figure 6e

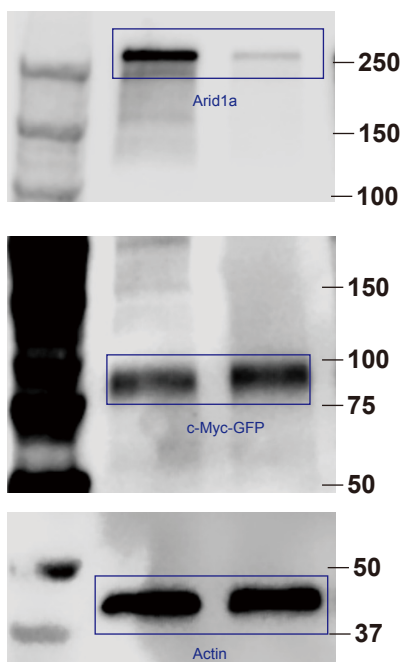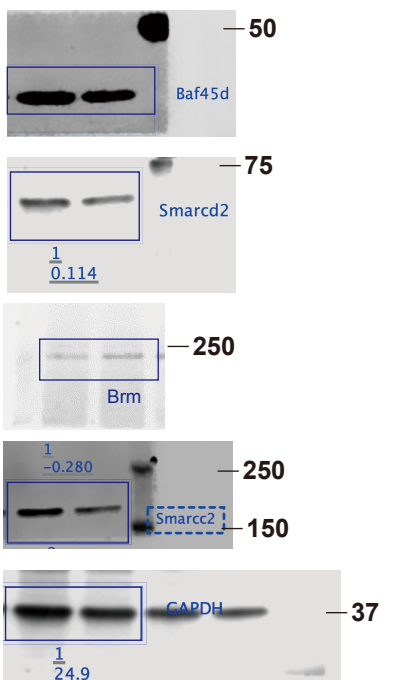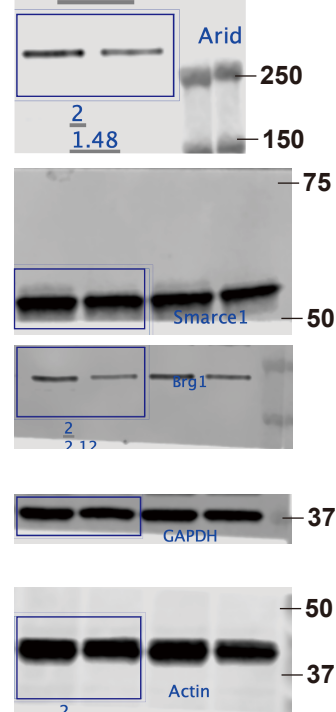

Supplement: NIHMS1826147-supplement-1826147_Sup_Fig_1.pdf [file NIHMS1826147-supplement-1826147_Sup_Fig_1.pdf]
